# Supplementary material for: Relocation of genes generates non-conserved chromosomal segments in Fusarium graminearum that show distinct and co-regulated gene expression patterns
Source: PubMed Central journal article supplement (PMC4022177; doi:10.1186/1471-2164-15-191), 2014-03-13

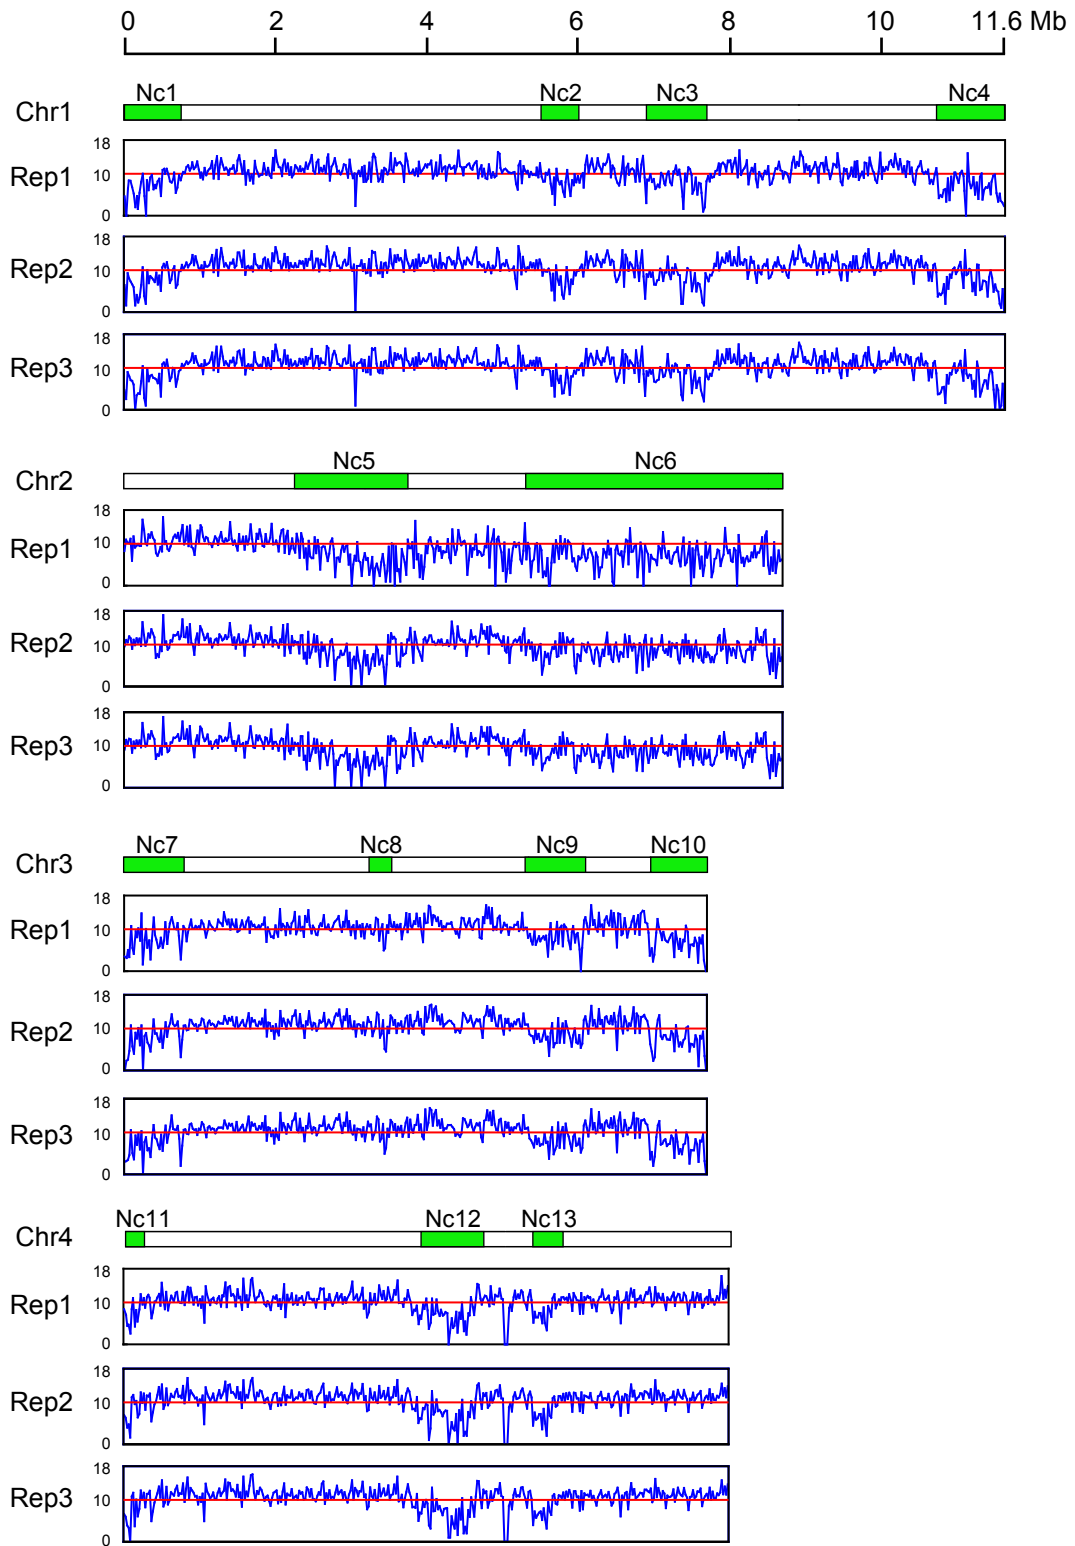

Supplement: 12864_2013_7029_MOESM3_ESM.pdf [file 12864_2013_7029_MOESM3_ESM.pdf]
